# Supplementary material for: In situ photodeposition of amorphous NixP on CdS nanorods for efficient visible-light photocatalytic H2 generation
Source: Royal Society of Chemistry journal article supplement (doi:10.1039/c9cy01244c), 2019-01-01
Supplement: c9cy01244c1.pdf [file c9cy01244c1.pdf]

## Supporting information

### **In situ photodeposition of amorphous Ni<sub>x</sub>P on CdS nanorods for efficient visible-light photocatalytic H<sub>2</sub> generation**

Simeng Zhu, Jing Wang, Yishan He, Zhiyang Yu, Xuxu Wang, Wenyue Su\*

*State Key Laboratory of Photocatalysis on Energy and Environment, College of  
Chemistry, Fuzhou University, Fuzhou Fujian 350116 P. R. China*

\* Corresponding author. E-mail: suweny@fzu.edu.cn; Tel: +86 0591 22865820

---

\* Corresponding author. E-mail: suweny@fzu.edu.cn; Tel: +86 0591 22865820

## Supplementary materials:

**Table S1** The loading amount of Ni<sub>x</sub>P in the Ni<sub>x</sub>P/CdS-t samples

| Samples                     | Ni(wt%) | P(wt%) | The molar ratio of Ni:P | Ni <sub>x</sub> P(wt%) |
|-----------------------------|---------|--------|-------------------------|------------------------|
| Ni <sub>x</sub> P/CdS-10min | 2.14    | 0.62   | 1.84                    | 2.76                   |
| Ni <sub>x</sub> P/CdS-20min | 2.34    | 0.82   | 1.51                    | 3.16                   |
| Ni <sub>x</sub> P/CdS-40min | 2.47    | 0.9    | 1.44                    | 3.37                   |
| Ni <sub>x</sub> P/CdS-60min | 2.55    | 0.97   | 1.42                    | 3.52                   |

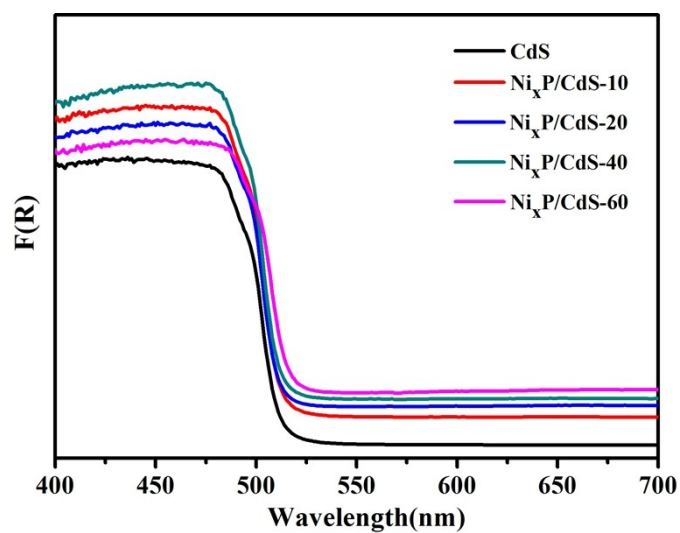

**Fig. S1.** UV-vis diffuse reflectance spectra of CdS and Ni<sub>x</sub>P/CdS-t samples.

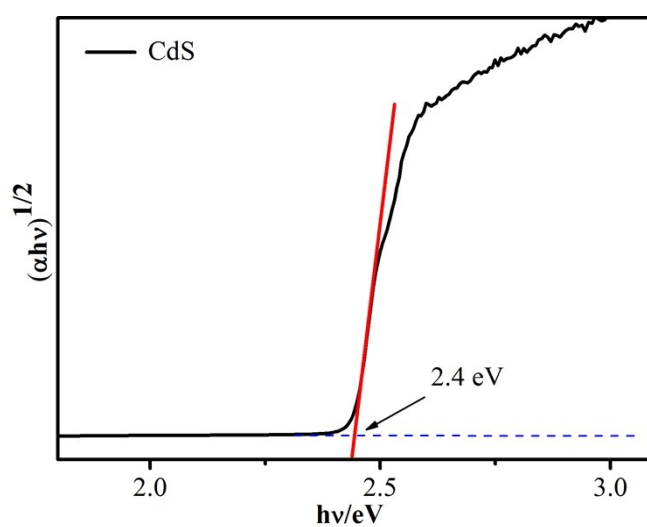

**Fig. S2.** Tauc plots of the CdS sample UV-vis spectra.

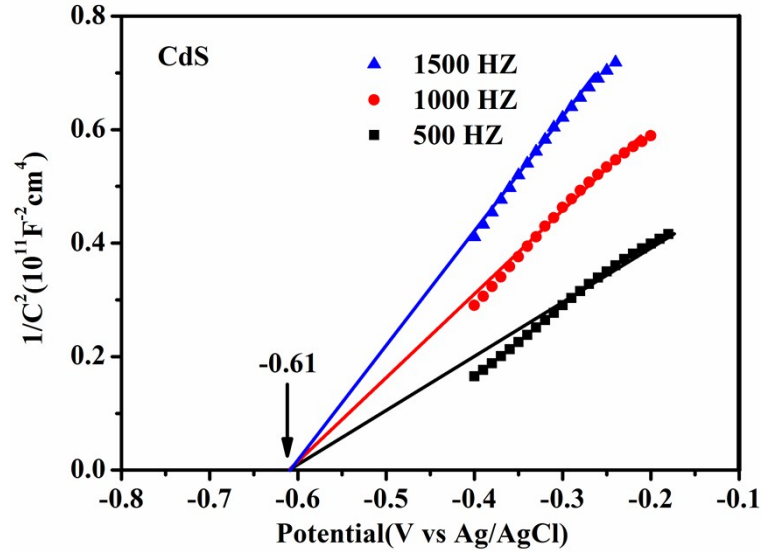

**Fig. S3.** Mott-Schottky plots of CdS sample.

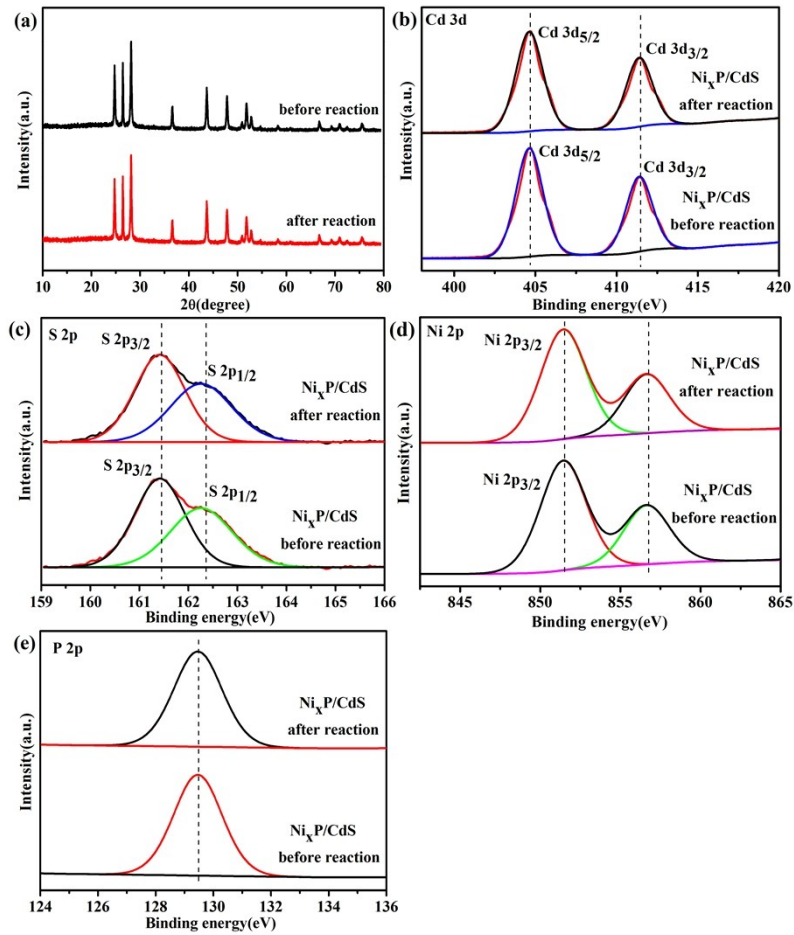

**Fig. S4.** Characterization of the Ni<sub>x</sub>P/CdS sample before and after cycling experiment: (a) XRD patterns, high-resolution XPS spectra of (b) Cd 3d; (c) S 2p; (d) Ni 2p; (e) P 2p.

**Table S2.** Preparation conditions for control experiments

| Samples                              | CdS/mg | NiCl <sub>2</sub> (0.1M)/mL | NaH <sub>2</sub> PO <sub>2</sub> (0.2M)/mL | H <sub>2</sub> O/mL | Irradiation/min |
|--------------------------------------|--------|-----------------------------|--------------------------------------------|---------------------|-----------------|
| Ni <sub>x</sub> P/CdS <sup>[a]</sup> | 100    | 2                           | 7                                          | 1                   | 20              |
| Ni/CdS <sup>[b]</sup>                | 100    | 2                           | 0                                          | 8                   | 20              |
| P/CdS <sup>[c]</sup>                 | 100    | 0                           | 7                                          | 3                   | 20              |
| D/CdS <sup>[d]</sup>                 | 100    | 2                           | 7                                          | 1                   | dark 20         |
| N/CdS <sup>[e]</sup>                 | 0      | 2                           | 7                                          | 1                   | 20              |

[a] CdS (100 mg), NiCl<sub>2</sub> (0.1 M 2 mL), NaH<sub>2</sub>PO<sub>2</sub> (0.2 M 7 mL), H<sub>2</sub>O (1 mL), illumination time (20 min); [b] absence of NaH<sub>2</sub>PO<sub>2</sub>; [c] absence of NiCl<sub>2</sub>; [d] absence of light; [e] absence of CdS.

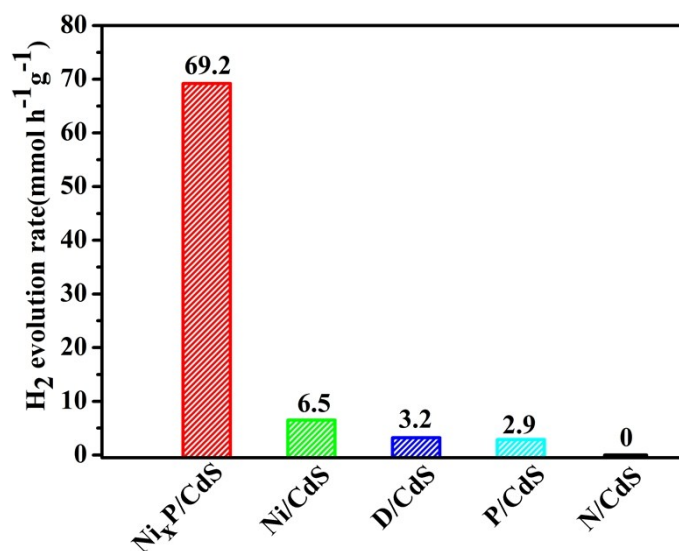

**Fig. S5.** Comparison of the photocatalytic H<sub>2</sub> evolution activity of samples obtained by control experiments in Table S2. Experimental conditions: 20 mg photocatalyst, 10 mL lactic acid and 90 mL water. The light source was a 300 W Xe lamp with a 420 nm cut-off filter.

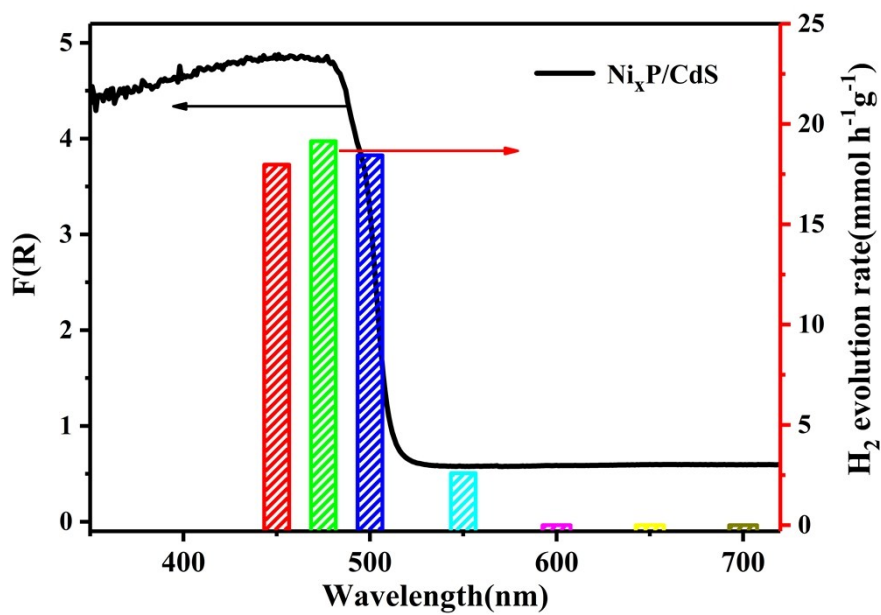

**Fig. S6.** Wavelength-dependent photocatalytic H<sub>2</sub> evolution performance over Ni<sub>x</sub>P/CdS sample.

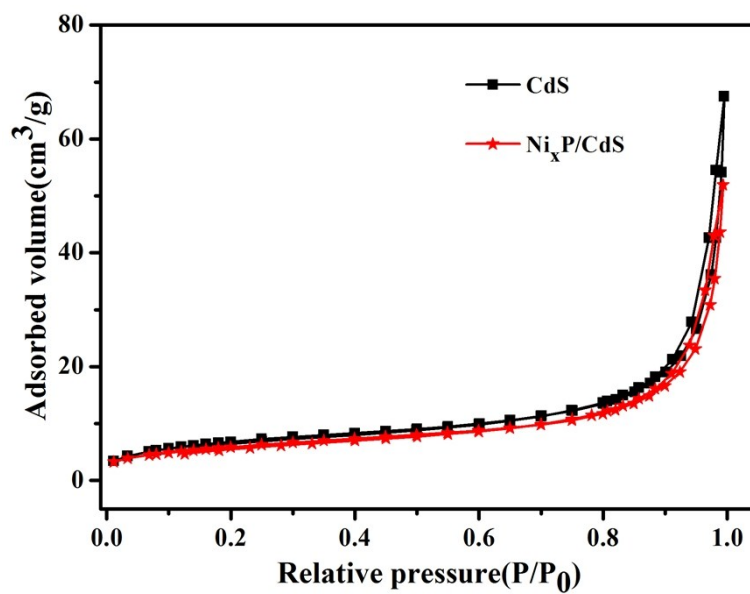

**Fig. S7.** N<sub>2</sub> adsorption-desorption isotherms of CdS and Ni<sub>x</sub>P/CdS samples.

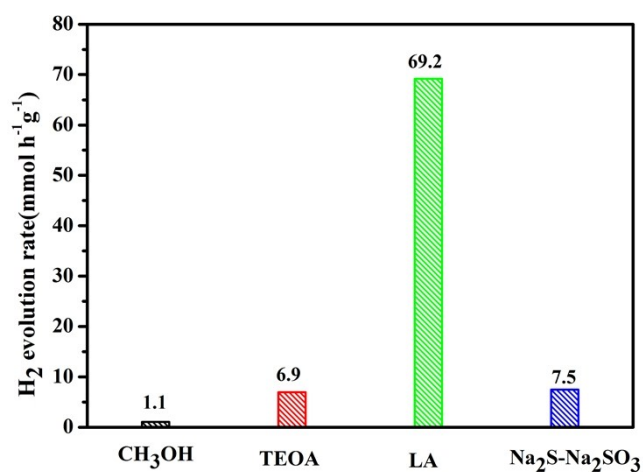

**Fig. S8.** Photocatalytic H<sub>2</sub> evolution performance under different sacrificial reagents over Ni<sub>x</sub>P/CdS sample.

**Table S3.** The data of time-resolved fluorescence

| Samples               | $\tau_1$ (ns) |       | $\tau_2$ (ns) |       | Ave. $\tau$ (ns) |
|-----------------------|---------------|-------|---------------|-------|------------------|
|                       | Value/ns      | Rel % | Value/ns      | Rel % |                  |
| Ni <sub>x</sub> P/CdS | 1.215         | 56.32 | 6.924         | 43.68 | 3.71             |
| CdS                   | 0.952         | 62.30 | 6.407         | 37.70 | 3.02             |

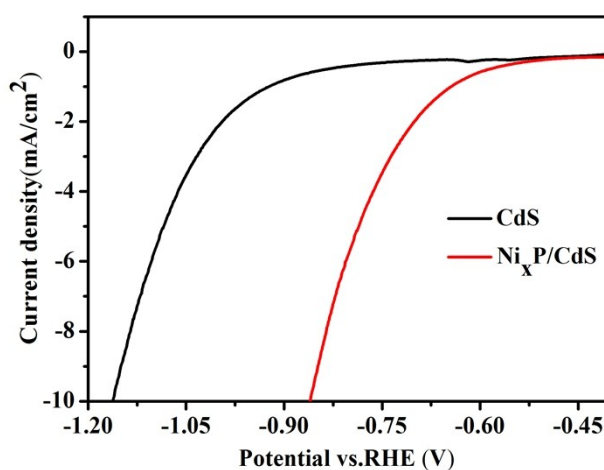

**Fig. S9.** LSV curves of CdS and Ni<sub>x</sub>P/CdS samples. The scan rate is 5 mV/s.
